# Supplementary material
Source: MDPI journal article supplement (https://www.mdpi.com/1424-8247/14/9/901)
Supplement: s1 [file s1]

## Supplementary Materials

### ***Caesalpinia mimosoides* Leaf Extract Promotes Neurite Outgrowth and Inhibits BACE1 Activity in Mutant APP-Overexpressing Neuronal Neuro2a Cells**

Panthakarn Rangsinth, Chatrawee Duangjan, Chanin Sillapachaiyaporn, Ciro Isidoro, Anchalee Prasansuklab and Tewin Tencomnao

**A**

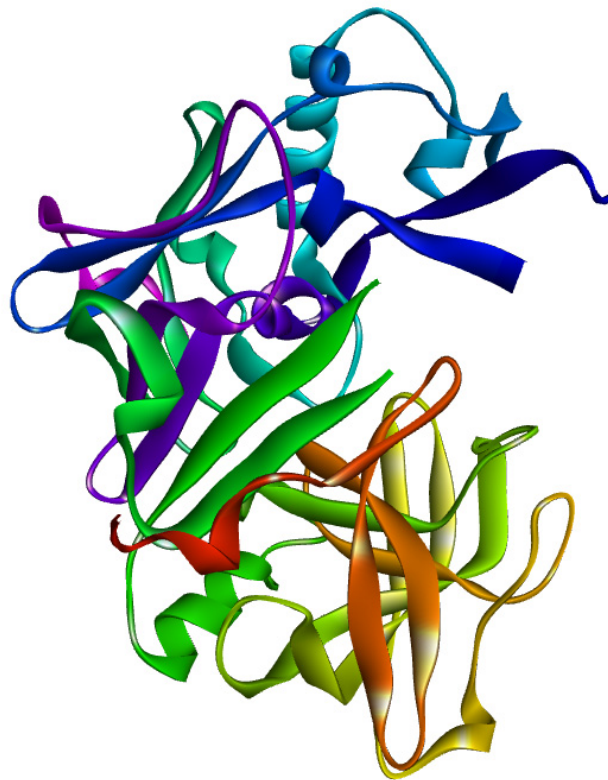

**B**

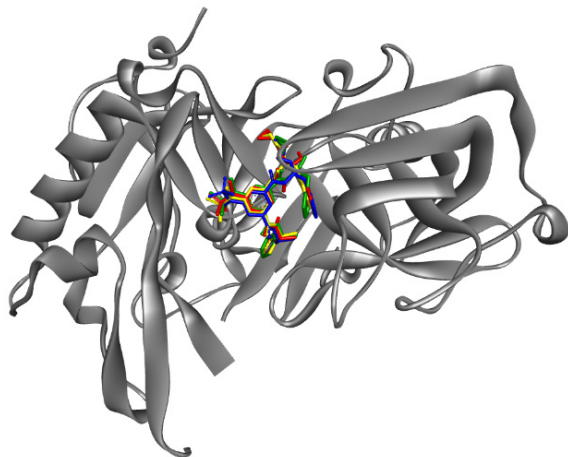

**C**

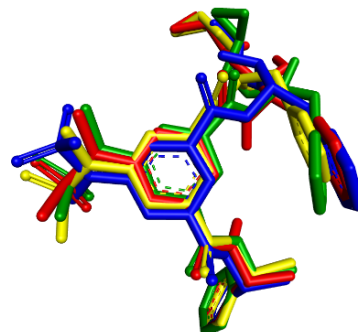

D

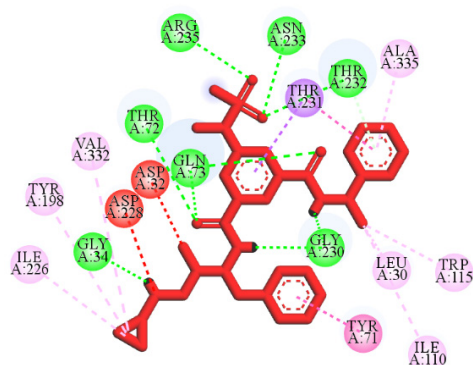

## Interactions

Conventional Hydrogen Bond  
Carbon Hydrogen Bond  
Unfavorable Acceptor-Acceptor  
Pi-Donor Hydrogen Bond  
Pi-Sigma

Pi-Pi T-shaped  
Amide-Pi Stacked  
Alkyl  
Pi-Alkyl

E

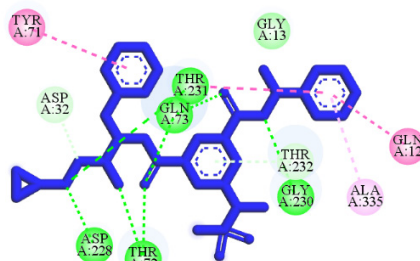

## Interactions

van der Waals  
Conventional Hydrogen Bond  
Carbon Hydrogen Bond  
Pi-Donor Hydrogen Bond

Pi-Pi T-shaped  
Amide-Pi Stacked  
Alkyl  
Pi-Alkyl

F

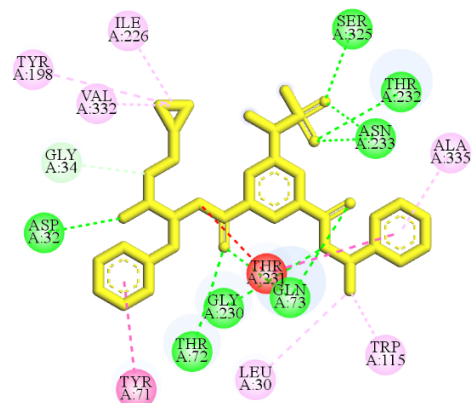

## Interactions

Conventional Hydrogen Bond  
Carbon Hydrogen Bond  
Unfavorable Donor-Donor  
Pi-Pi T-shaped

Amide-Pi Stacked  
Alkyl  
Pi-Alkyl

G

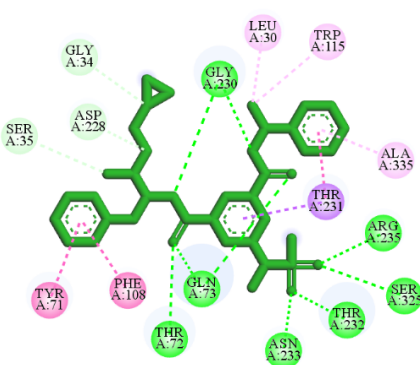

## Interactions

Conventional Hydrogen Bond  
Carbon Hydrogen Bond  
Pi-Sigma  
Pi-Pi T-shaped

Amide-Pi Stacked  
Alkyl  
Pi-Alkyl

**Figure S1.** Diagrams represent protein-ligand interactions. (A) BACE1 structure (PBB ID 3TPP) (B-C) Overlapping structures of 5HA original crystal structure (red) and re-docking conformation on BACE1 (blue, yellow, and green are from redocking run 1-3, respectively). Schematics of amino acid interactions of BACE1 and 5HA: (D) 5HA from crystal structure, (E) 5HA from re-docking run 1, (F) 5HA from re-docking run 2, and (G) 5HA from re-docking run 3.

**Table S1.** Diagrams of protein-ligand interactions of BACE1 and candidate ligands.

| Ligand                             | Protein-ligand interactions                                                                                                                                               |
|------------------------------------|---------------------------------------------------------------------------------------------------------------------------------------------------------------------------|
| Quercetin<br>(reference inhibitor) | 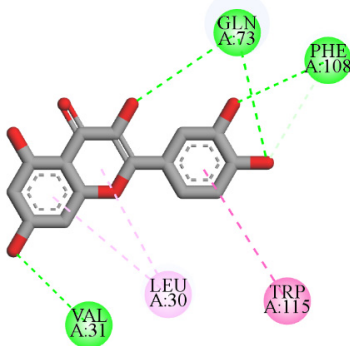       |
| 3-O-Methylgallate                  |     |
| 4-Aminomethylindole                |   |
| Bergenin                           |    |

**Ligand**                      **Protein-ligand interactions**

Clausarinol

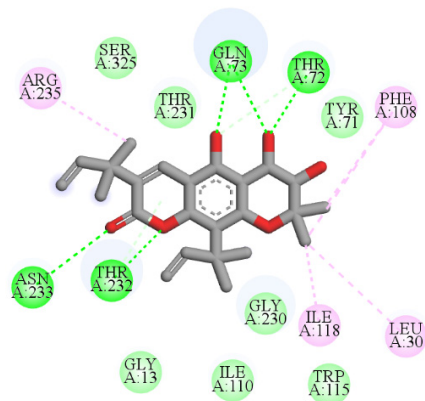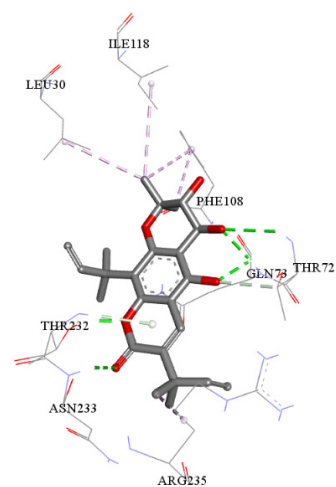

Emmotin A

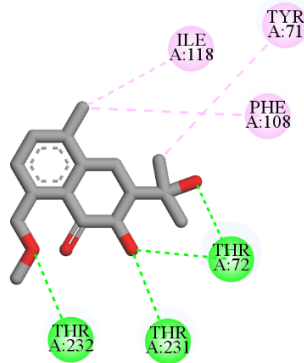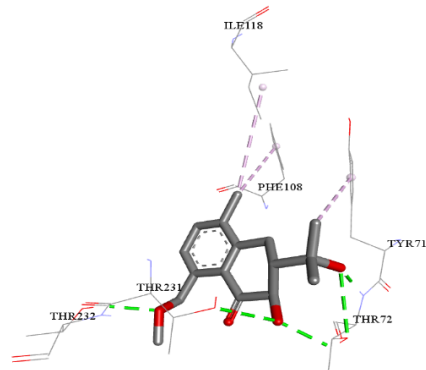

Gallic acid

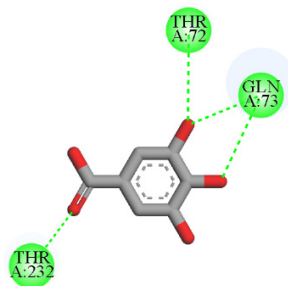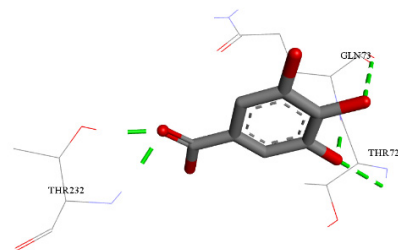

**Ligand**                      **Protein-ligand interactions**

N-D-Glucosylarylamine

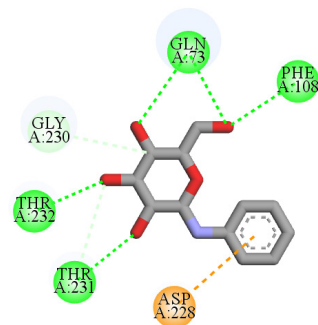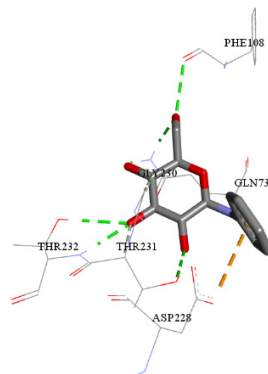

Quercetin-3'-glucuronide

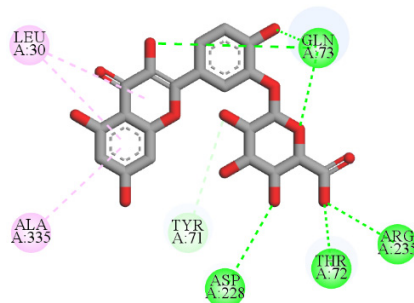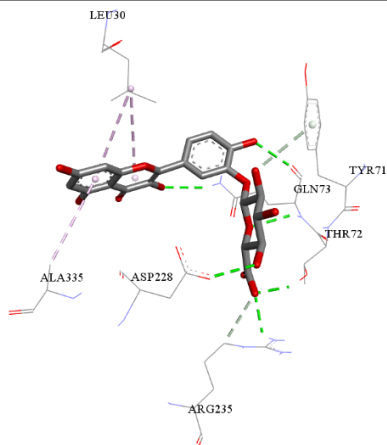

Quercetin-3-O-glucoside

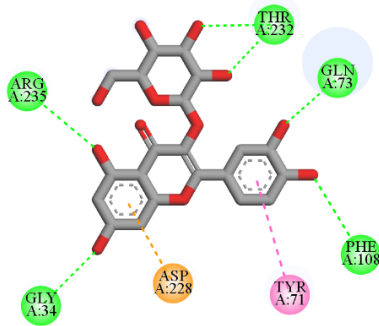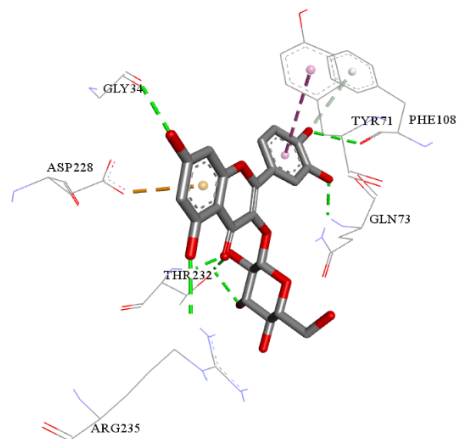

---

**Ligand****Protein-ligand interactions**

---

Theogallin

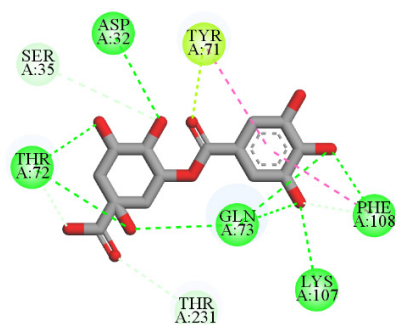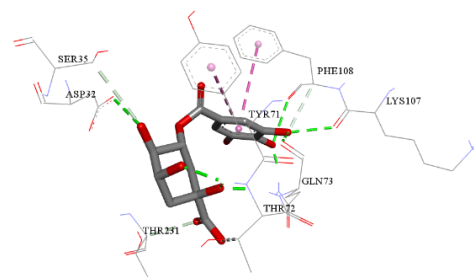

---

Green-dashes indicate hydrogen bonds. Pink-dashes indicate hydrophobic bonds. Orange-dashes indicate electrostatic bonds.
